# Supplementary material
Source: publisher figshare collection journal article supplement (https://acs.figshare.com/ndownloader/files/3989929)
Supplement: Supplementary file 1 [file 3989929]

 
data_ueta 
 
_audit_creation_method            SHELXL-97 
_chemical_name_systematic 
; 
 ? 
; 
_chemical_name_common             ? 
_chemical_melting_point           ? 
_chemical_formula_moiety          ? 
_chemical_formula_sum 
 'C53 H87 N5 P2' 
_chemical_formula_weight          856.22 
 
loop_ 
 _atom_type_symbol 
 _atom_type_description 
 _atom_type_scat_dispersion_real 
 _atom_type_scat_dispersion_imag 
 _atom_type_scat_source 
 'C'  'C'   0.0033   0.0016 
 'International Tables Vol C Tables 4.2.6.8 and 6.1.1.4' 
 'H'  'H'   0.0000   0.0000 
 'International Tables Vol C Tables 4.2.6.8 and 6.1.1.4' 
 'N'  'N'   0.0061   0.0033 
 'International Tables Vol C Tables 4.2.6.8 and 6.1.1.4' 
 'P'  'P'   0.1023   0.0942 
 'International Tables Vol C Tables 4.2.6.8 and 6.1.1.4' 
 
_symmetry_cell_setting            triclinic 
_symmetry_space_group_name_H-M    P-1 
 
loop_ 
 _symmetry_equiv_pos_as_xyz 
 'x, y, z' 
 '-x, -y, -z' 
 
_cell_length_a                    9.4039(5) 
_cell_length_b                    15.7033(8) 
_cell_length_c                    19.3399(10) 
_cell_angle_alpha                 70.5365(15) 
_cell_angle_beta                  82.3034(17) 
_cell_angle_gamma                 88.2449(18) 
_cell_volume                      2668.2(2) 
_cell_formula_units_Z             2 
_cell_measurement_temperature     123(2) 
_cell_measurement_reflns_used     ? 
_cell_measurement_theta_min       ? 
_cell_measurement_theta_max       ? 
 
_exptl_crystal_description        ? 
_exptl_crystal_colour             ? 
_exptl_crystal_size_max           0.26 
_exptl_crystal_size_mid           0.15 
_exptl_crystal_size_min           0.08 
_exptl_crystal_density_meas       ? 
_exptl_crystal_density_diffrn     1.066 
_exptl_crystal_density_method     'not measured' 
_exptl_crystal_F_000              940 
_exptl_absorpt_coefficient_mu     0.119 
_exptl_absorpt_correction_type    ? 
_exptl_absorpt_correction_T_min   0.9698 
_exptl_absorpt_correction_T_max   0.9906 
_exptl_absorpt_process_details    ? 
 
_exptl_special_details 
; 
 ? 
; 
 
_diffrn_ambient_temperature       123(2) 
_diffrn_radiation_wavelength      0.71075 
_diffrn_radiation_type            MoK\a 
_diffrn_radiation_source          'fine-focus sealed tube' 
_diffrn_radiation_monochromator   graphite 
_diffrn_measurement_device_type   ? 
_diffrn_measurement_method        ? 
_diffrn_detector_area_resol_mean  ? 
_diffrn_standards_number          ? 
_diffrn_standards_interval_count  ? 
_diffrn_standards_interval_time   ? 
_diffrn_standards_decay_%         ? 
_diffrn_reflns_number             26573 
_diffrn_reflns_av_R_equivalents   0.0558 
_diffrn_reflns_av_sigmaI/netI     0.0746 
_diffrn_reflns_limit_h_min        -12 
_diffrn_reflns_limit_h_max        12 
_diffrn_reflns_limit_k_min        -20 
_diffrn_reflns_limit_k_max        20 
_diffrn_reflns_limit_l_min        -25 
_diffrn_reflns_limit_l_max        25 
_diffrn_reflns_theta_min          3.01 
_diffrn_reflns_theta_max          27.49 
_reflns_number_total              12164 
_reflns_number_gt                 8011 
_reflns_threshold_expression      >2sigma(I) 
 
_computing_data_collection        ? 
_computing_cell_refinement        ? 
_computing_data_reduction         ? 
_computing_structure_solution     'SHELXS-97 (Sheldrick, 1990)' 
_computing_structure_refinement   'SHELXL-97 (Sheldrick, 1997)' 
_computing_molecular_graphics     ? 
_computing_publication_material   ? 
 
_refine_special_details 
; 
 Refinement of F^2^ against ALL reflections.  The weighted R-factor wR and 
 goodness of fit S are based on F^2^, conventional R-factors R are based 
 on F, with F set to zero for negative F^2^. The threshold expression of 
 F^2^ > 2sigma(F^2^) is used only for calculating R-factors(gt) etc. and is 
 not relevant to the choice of reflections for refinement.  R-factors based 
 on F^2^ are statistically about twice as large as those based on F, and R- 
 factors based on ALL data will be even larger. 
; 
 
_refine_ls_structure_factor_coef  Fsqd  
_refine_ls_matrix_type            full 
_refine_ls_weighting_scheme       calc  
_refine_ls_weighting_details 
 'calc w=1/[\s^2^(Fo^2^)+(0.1000P)^2^+0.0000P] where P=(Fo^2^+2Fc^2^)/3' 
_atom_sites_solution_primary      direct 
_atom_sites_solution_secondary    difmap 
_atom_sites_solution_hydrogens    geom 
_refine_ls_hydrogen_treatment     mixed 
_refine_ls_extinction_method      none 
_refine_ls_extinction_coef        ? 
_refine_ls_number_reflns          12164 
_refine_ls_number_parameters      934 
_refine_ls_number_restraints      0 
_refine_ls_R_factor_all           0.1015 
_refine_ls_R_factor_gt            0.0605 
_refine_ls_wR_factor_ref          0.2297 
_refine_ls_wR_factor_gt           0.1547 
_refine_ls_goodness_of_fit_ref    1.363 
_refine_ls_restrained_S_all       1.363 
_refine_ls_shift/su_max           0.010 
_refine_ls_shift/su_mean          0.001 
 
loop_ 
 _atom_site_label 
 _atom_site_type_symbol 
 _atom_site_fract_x 
 _atom_site_fract_y 
 _atom_site_fract_z 
 _atom_site_U_iso_or_equiv 
 _atom_site_adp_type 
 _atom_site_occupancy 
 _atom_site_symmetry_multiplicity 
 _atom_site_calc_flag 
 _atom_site_refinement_flags 
 _atom_site_disorder_assembly 
 _atom_site_disorder_group 
C1 C 0.4222(3) 1.02472(16) 0.24192(13) 0.0289(5) Uani 1 1 d . . . 
C2 C 0.4523(3) 0.86120(16) 0.31760(13) 0.0284(5) Uani 1 1 d . . . 
H2 H 0.473(3) 0.754(2) 0.2340(17) 0.045(8) Uiso 1 1 d . . . 
H2A H 0.365(4) 0.968(2) 0.4838(18) 0.052(9) Uiso 1 1 d . . . 
H2B H 1.073(4) 0.934(2) 0.0229(18) 0.051(9) Uiso 1 1 d . . . 
H2C H 0.360(4) 0.700(2) 0.203(2) 0.069(11) Uiso 1 1 d . . . 
H2D H 0.735(5) 0.714(3) 0.539(3) 0.096(15) Uiso 1 1 d . . . 
C3 C 0.6333(3) 0.92463(16) 0.16447(13) 0.0274(5) Uani 1 1 d . . . 
H3 H 0.860(4) 0.744(2) 0.4757(18) 0.055(9) Uiso 1 1 d . . . 
H3A H 0.462(4) 0.641(2) 0.2642(18) 0.055(9) Uiso 1 1 d . . . 
C4 C 0.8286(3) 0.85231(17) 0.13540(13) 0.0291(5) Uani 1 1 d . . . 
C5 C 0.7901(3) 0.99636(16) 0.06574(13) 0.0280(5) Uani 1 1 d . . . 
C6 C 0.2404(3) 0.96921(18) 0.39915(14) 0.0335(6) Uani 1 1 d . . . 
C7 C 0.2025(3) 1.0694(2) 0.37921(17) 0.0402(7) Uani 1 1 d . . . 
C8 C 0.1153(3) 0.9142(3) 0.3927(2) 0.0466(7) Uani 1 1 d . . . 
C9 C 0.2799(4) 0.9329(2) 0.47808(15) 0.0420(7) Uani 1 1 d . . . 
P1 P 0.46085(7) 0.92362(4) 0.22156(3) 0.02803(18) Uani 1 1 d . . . 
H1 H 0.553(6) 1.326(4) 0.071(4) 0.14(2) Uiso 1 1 d . . . 
H1A H 0.194(4) 0.936(2) 0.515(2) 0.067(11) Uiso 1 1 d . . . 
H1B H 0.329(9) 0.648(5) 0.649(4) 0.100 Uiso 0.662(8) 1 d P A 1 
H1C H 0.299(4) 0.867(3) 0.489(2) 0.066(11) Uiso 1 1 d . . . 
H1D H 0.552(5) 1.413(3) -0.007(2) 0.086(13) Uiso 1 1 d . . . 
H1E H 0.091(7) 0.482(4) 0.638(4) 0.100 Uiso 0.662(8) 1 d P A 1 
H1F H 0.149(5) 0.488(3) 0.553(3) 0.050 Uiso 0.662(8) 1 d P A 1 
H1G H 0.650(9) 0.600(5) 0.157(4) 0.09(2) Uiso 0.617(12) 1 d P B 1 
H1H H 0.764(4) 0.665(3) 0.473(2) 0.077(13) Uiso 1 1 d . . . 
P2 P 0.40235(7) 0.96044(4) 0.33437(3) 0.02787(18) Uani 1 1 d . . . 
H2E H 0.698(9) 0.571(5) 0.045(5) 0.18(3) Uiso 1 1 d . . . 
H2F H 0.969(7) 0.629(4) 0.144(3) 0.053(16) Uiso 0.617(12) 1 d P B 1 
H2G H 0.877(8) 0.556(5) 0.042(4) 0.16(3) Uiso 1 1 d . . . 
H2H H 0.196(8) 0.670(5) 0.622(4) 0.100 Uiso 0.662(8) 1 d P A 1 
H2I H 0.492(8) 0.517(5) 0.618(4) 0.100 Uiso 0.662(8) 1 d P A 1 
H2J H 0.218(5) 0.574(3) 0.691(3) 0.050 Uiso 0.662(8) 1 d P A 1 
H2K H 0.361(6) 0.448(3) 0.655(3) 0.050 Uiso 0.662(8) 1 d P A 1 
H2L H 0.715(6) 1.383(3) 0.026(3) 0.108(18) Uiso 1 1 d . . . 
H2M H 0.398(10) 0.446(6) 0.582(6) 0.12(3) Uiso 0.662(8) 1 d P A 1 
N1 N 0.7056(2) 0.84734(13) 0.18068(11) 0.0298(5) Uani 1 1 d . . . 
H1I H 0.064(6) 0.574(4) 0.569(3) 0.050 Uiso 0.662(8) 1 d P A 1 
H1J H 0.748(6) 0.494(4) 0.121(3) 0.12(2) Uiso 1 1 d . . . 
H1K H 0.731(3) 1.086(2) 0.1934(19) 0.052(9) Uiso 1 1 d . . . 
H1L H 0.734(9) 0.685(6) 0.085(5) 0.11(3) Uiso 0.617(12) 1 d P B 1 
H1M H 0.131(4) 0.768(2) 0.2338(19) 0.053(9) Uiso 1 1 d . . . 
H1N H 0.938(5) 0.667(3) 0.234(2) 0.094(14) Uiso 1 1 d . . . 
H1O H 0.082(4) 0.764(2) 0.3191(18) 0.048(9) Uiso 1 1 d . . . 
H1P H 0.866(6) 0.553(4) 0.211(3) 0.063(17) Uiso 0.617(12) 1 d P . . 
H1Q H 0.182(3) 0.9900(19) 0.2111(16) 0.043(8) Uiso 1 1 d . . . 
N2 N 0.8798(2) 0.92544(14) 0.07908(11) 0.0302(5) Uani 1 1 d . . . 
H2N H 0.207(4) 0.839(2) 0.2685(18) 0.051(9) Uiso 1 1 d . . . 
H2O H 0.825(4) 1.080(2) 0.262(2) 0.063(10) Uiso 1 1 d . . . 
H2P H 0.837(4) 1.2303(19) 0.2363(16) 0.043(8) Uiso 1 1 d . . . 
H2Q H 0.986(4) 0.776(2) 0.111(2) 0.075(12) Uiso 1 1 d . . . 
H2R H 0.681(4) 1.180(3) 0.070(2) 0.080(12) Uiso 1 1 d . . . 
H2S H 0.519(3) 0.6786(19) 0.5437(17) 0.039(8) Uiso 1 1 d . . . 
H2T H 0.255(3) 0.552(2) 0.3473(17) 0.049(9) Uiso 1 1 d . . . 
H2U H 0.031(4) 0.925(2) 0.428(2) 0.063(10) Uiso 1 1 d . . . 
H2V H 0.707(4) 0.864(2) 0.3181(19) 0.055(9) Uiso 1 1 d . . . 
N3 N 0.6644(2) 0.99949(14) 0.10735(11) 0.0307(5) Uani 1 1 d . . . 
H3B H 0.756(4) 0.898(2) 0.4602(19) 0.058(10) Uiso 1 1 d . . . 
H3C H 0.717(4) 1.136(2) 0.3608(18) 0.054(9) Uiso 1 1 d . . . 
H3D H 0.364(4) 1.145(3) 0.029(2) 0.080(12) Uiso 1 1 d . . . 
H3E H 0.825(4) 1.236(2) 0.0101(19) 0.063(11) Uiso 1 1 d . . . 
H3F H 0.565(4) 1.087(2) 0.3768(18) 0.052(9) Uiso 1 1 d . . . 
H3G H 0.174(3) 1.274(2) 0.1403(16) 0.042(8) Uiso 1 1 d . . . 
H3H H 0.670(4) 1.016(2) 0.2829(19) 0.056(9) Uiso 1 1 d . . . 
H3I H 0.142(4) 0.850(3) 0.413(2) 0.073(12) Uiso 1 1 d . . . 
H3J H 0.635(4) 1.116(2) -0.0182(18) 0.054(9) Uiso 1 1 d . . . 
N4 N 0.9075(3) 0.77646(15) 0.14663(13) 0.0377(5) Uani 1 1 d . B . 
H3K H 0.067(4) 1.010(2) 0.1480(19) 0.058(10) Uiso 1 1 d . . . 
H4 H 0.167(4) 0.606(2) 0.278(2) 0.066(11) Uiso 1 1 d . . . 
H4A H 0.055(4) 1.056(2) 0.212(2) 0.060(10) Uiso 1 1 d . . . 
H4B H 0.108(3) 0.6033(18) 0.3590(17) 0.036(8) Uiso 1 1 d . . . 
H4C H 0.280(4) 1.048(2) 0.0506(19) 0.055(9) Uiso 1 1 d . . . 
H4D H 0.405(3) 1.0521(19) 0.0955(16) 0.037(7) Uiso 1 1 d . . . 
H4E H 0.854(4) 0.8393(19) 0.3571(17) 0.046(8) Uiso 1 1 d . . . 
H4F H 0.753(4) 1.254(2) 0.165(2) 0.057(9) Uiso 1 1 d . . . 
H4G H 0.708(3) 1.299(2) 0.2329(17) 0.047(8) Uiso 1 1 d . . . 
H4H H 0.577(4) 1.197(2) 0.359(2) 0.066(11) Uiso 1 1 d . . . 
N5 N 0.8300(2) 1.06818(13) 0.00601(12) 0.0307(5) Uani 1 1 d . . . 
H5 H 0.759(4) 0.763(2) 0.339(2) 0.067(11) Uiso 1 1 d . . . 
H5A H 0.607(4) 0.929(3) 0.423(2) 0.079(12) Uiso 1 1 d . . . 
H5B H 0.604(4) 0.860(2) 0.506(2) 0.063(10) Uiso 1 1 d . . . 
H5C H 0.074(4) 1.147(2) 0.049(2) 0.060(10) Uiso 1 1 d . . . 
H5D H 0.035(4) 1.195(2) 0.1060(18) 0.044(9) Uiso 1 1 d . . . 
H5E H 0.540(4) 1.270(2) -0.0262(19) 0.060(10) Uiso 1 1 d . . . 
H5F H 0.677(4) 1.320(2) -0.075(2) 0.063(10) Uiso 1 1 d . . . 
H5G H 0.767(5) 0.696(3) 0.233(2) 0.079(12) Uiso 1 1 d . . . 
H5H H 0.170(5) 1.243(3) 0.033(3) 0.103(15) Uiso 1 1 d . . . 
C10 C 0.4409(3) 0.76903(16) 0.37374(13) 0.0281(5) Uani 1 1 d . . . 
H10 H 0.075(4) 0.935(3) 0.343(2) 0.079(12) Uiso 1 1 d . . . 
C11 C 0.3360(3) 0.70374(16) 0.37657(14) 0.0308(5) Uani 1 1 d . . . 
C12 C 0.2915(3) 0.63847(18) 0.44539(15) 0.0351(6) Uani 1 1 d . . . 
C13 C 0.3471(3) 0.63202(17) 0.50965(15) 0.0354(6) Uani 1 1 d . A . 
C14 C 0.4669(3) 0.68533(18) 0.50138(15) 0.0355(6) Uani 1 1 d . . . 
C15 C 0.5208(3) 0.75064(16) 0.43441(14) 0.0294(5) Uani 1 1 d . . . 
C16 C 0.2742(3) 0.69841(17) 0.30789(15) 0.0346(6) Uani 1 1 d . . . 
C17 C 0.1935(4) 0.6083(2) 0.3246(2) 0.0456(7) Uani 1 1 d . . . 
C18 C 0.4000(3) 0.6998(2) 0.24766(17) 0.0397(6) Uani 1 1 d . . . 
C19 C 0.1670(3) 0.7741(2) 0.27998(18) 0.0394(6) Uani 1 1 d . . . 
C20 C 0.6712(3) 0.79251(18) 0.43174(14) 0.0329(6) Uani 1 1 d . . . 
C21 C 0.7611(4) 0.7218(3) 0.4840(3) 0.0648(11) Uani 1 1 d . . . 
C22 C 0.7577(3) 0.8170(3) 0.35506(18) 0.0435(7) Uani 1 1 d . . . 
C23 C 0.6600(3) 0.8748(2) 0.45741(19) 0.0436(7) Uani 1 1 d . . . 
C24 C 0.4079(3) 1.12347(16) 0.20999(13) 0.0279(5) Uani 1 1 d . . . 
C25 C 0.2933(3) 1.16394(18) 0.16858(14) 0.0335(6) Uani 1 1 d . . . 
C26 C 0.2525(3) 1.25115(18) 0.16565(16) 0.0387(6) Uani 1 1 d . . . 
C27 C 0.3162(3) 1.30077(19) 0.20031(17) 0.0430(7) Uani 1 1 d . C . 
C28 C 0.4387(3) 1.26519(19) 0.23091(16) 0.0402(6) Uani 1 1 d . . . 
C29 C 0.4916(3) 1.17983(17) 0.23362(13) 0.0314(6) Uani 1 1 d . . . 
C30 C 0.2141(3) 1.11589(18) 0.12669(16) 0.0363(6) Uani 1 1 d . . . 
C31 C 0.3250(3) 1.0880(2) 0.07238(17) 0.0399(7) Uani 1 1 d . . . 
C32 C 0.1240(3) 1.0354(2) 0.1787(2) 0.0448(7) Uani 1 1 d . . . 
C33 C 0.1109(4) 1.1804(3) 0.0775(2) 0.0524(9) Uani 1 1 d . . . 
C34 C 0.6406(3) 1.15872(18) 0.26211(14) 0.0347(6) Uani 1 1 d . . . 
C35 C 0.7419(4) 1.2407(2) 0.22171(18) 0.0451(7) Uani 1 1 d . . . 
C36 C 0.6247(4) 1.1439(2) 0.34563(16) 0.0422(7) Uani 1 1 d . . . 
C37 C 0.7194(3) 1.0780(2) 0.24773(17) 0.0404(7) Uani 1 1 d . . . 
C38 C 0.7324(3) 1.14297(19) -0.02328(15) 0.0360(6) Uani 1 1 d . . . 
C39 C 0.7222(4) 1.21326(19) 0.01465(17) 0.0409(7) Uani 1 1 d . . . 
C40 C 0.6318(4) 1.2933(2) -0.0224(2) 0.0515(8) Uani 1 1 d . . . 
C41 C 0.6088(7) 1.3586(3) 0.0207(2) 0.0778(14) Uani 1 1 d . . . 
C42 C 0.8619(4) 0.68844(19) 0.20001(17) 0.0444(7) Uani 1 1 d . . . 
C43 C 0.8709(10) 0.6162(4) 0.1674(4) 0.052(2) Uani 0.617(12) 1 d P B 1 
C44 C 0.7478(11) 0.6217(6) 0.1206(5) 0.075(3) Uani 0.617(12) 1 d P B 1 
C45 C 0.7773(15) 0.5509(6) 0.0773(6) 0.144(3) Uani 1 1 d . . . 
C46 C 0.7791(14) 0.6344(7) 0.1598(7) 0.052(3) Uani 0.383(12) 1 d P B 2 
H46 H 0.7318 0.5799 0.1974 0.07(3) Uiso 0.383(12) 1 calc PR B 2 
H46A H 0.7036 0.6731 0.1346 0.14(7) Uiso 0.383(12) 1 calc PR B 2 
C47 C 0.8813(14) 0.6063(6) 0.1034(6) 0.063(4) Uani 0.383(12) 1 d P B 2 
H47 H 0.9597 0.5685 0.1266 0.18(7) Uiso 0.383(12) 1 calc PR B 2 
H47A H 0.9230 0.6594 0.0621 0.09(4) Uiso 0.383(12) 1 calc PR B 2 
C48 C 0.2575(4) 1.3916(2) 0.2044(2) 0.0638(10) Uani 1 1 d . . . 
C49 C 0.3742(16) 1.4618(9) 0.1862(7) 0.084(4) Uani 0.636(18) 1 d P C 1 
H49 H 0.3316 1.5197 0.1858 0.100 Uiso 0.636(18) 1 calc PR C 1 
H49A H 0.4271 1.4684 0.1374 0.100 Uiso 0.636(18) 1 calc PR C 1 
H49B H 0.4401 1.4431 0.2236 0.050 Uiso 0.636(18) 1 calc PR C 1 
C50 C 0.1365(18) 1.4242(9) 0.1605(12) 0.162(10) Uani 0.636(18) 1 d P C 1 
H50 H 0.0526 1.3845 0.1834 0.100 Uiso 0.636(18) 1 calc PR C 1 
H50A H 0.1644 1.4239 0.1100 0.14(5) Uiso 0.636(18) 1 calc PR C 1 
H50B H 0.1126 1.4859 0.1593 0.100 Uiso 0.636(18) 1 calc PR C 1 
C51 C 0.2002(15) 1.3718(6) 0.2904(7) 0.098(4) Uani 0.636(18) 1 d P C 1 
H51 H 0.1579 1.4267 0.2973 0.100 Uiso 0.636(18) 1 calc PR C 1 
H51A H 0.2804 1.3533 0.3194 0.100 Uiso 0.636(18) 1 calc PR C 1 
H51B H 0.1273 1.3234 0.3068 0.050 Uiso 0.636(18) 1 calc PR C 1 
C52 C 0.3620(18) 1.4488(15) 0.217(2) 0.112(11) Uani 0.364(18) 1 d P C 2 
H52 H 0.3227 1.5093 0.2097 0.100 Uiso 0.364(18) 1 calc PR C 2 
H52A H 0.4501 1.4528 0.1830 0.100 Uiso 0.364(18) 1 calc PR C 2 
H52B H 0.3837 1.4228 0.2684 0.100 Uiso 0.364(18) 1 calc PR C 2 
C53 C 0.233(3) 1.4509(10) 0.1228(9) 0.092(7) Uani 0.364(18) 1 d P C 2 
H53 H 0.1558 1.4235 0.1073 0.100 Uiso 0.364(18) 1 calc PR C 2 
H53A H 0.3213 1.4538 0.0890 0.100 Uiso 0.364(18) 1 calc PR C 2 
H53B H 0.2054 1.5121 0.1216 0.050 Uiso 0.364(18) 1 calc PR C 2 
H53C H 0.223(3) 0.5967(19) 0.4456(16) 0.039(8) Uiso 1 1 d . . . 
H53D H 0.122(3) 1.0750(17) 0.4149(15) 0.030(7) Uiso 1 1 d . . . 
H53E H 0.173(3) 1.0920(18) 0.3324(16) 0.032(7) Uiso 1 1 d . . . 
H53F H 0.291(4) 1.110(2) 0.3778(18) 0.056(9) Uiso 1 1 d . . . 
H53G H 0.492(3) 1.2971(18) 0.2512(16) 0.035(7) Uiso 1 1 d . . . 
H53H H 0.774(3) 1.1744(16) -0.0770(15) 0.025(6) Uiso 1 1 d . . . 
C54 C 0.126(2) 1.3796(9) 0.2522(10) 0.078(6) Uani 0.364(18) 1 d P C 2 
H54 H 0.0823 1.4385 0.2469 0.050 Uiso 0.364(18) 1 calc PR C 2 
H54A H 0.1441 1.3504 0.3035 0.100 Uiso 0.364(18) 1 calc PR C 2 
H54B H 0.0608 1.3415 0.2393 0.100 Uiso 0.364(18) 1 calc PR C 2 
C55 C 0.2871(4) 0.5662(2) 0.58533(16) 0.0444(7) Uani 1 1 d . . . 
C56 C 0.3935(7) 0.4915(4) 0.6102(4) 0.0598(18) Uani 0.662(8) 1 d P A 1 
C57 C 0.1402(6) 0.5251(5) 0.5854(3) 0.0560(16) Uani 0.662(8) 1 d P A 1 
C58 C 0.2646(8) 0.6170(4) 0.6420(3) 0.0593(19) Uani 0.662(8) 1 d P A 1 
C59 C 0.2947(19) 0.4688(7) 0.5836(7) 0.071(4) Uani 0.338(8) 1 d P A 2 
H59 H 0.2609 0.4267 0.6329 0.100 Uiso 0.338(8) 1 calc PR A 2 
H59A H 0.3941 0.4552 0.5686 0.050 Uiso 0.338(8) 1 calc PR A 2 
H59B H 0.2338 0.4627 0.5481 0.100 Uiso 0.338(8) 1 calc PR A 2 
C60 C 0.1413(17) 0.5891(11) 0.6026(8) 0.095(7) Uani 0.338(8) 1 d P A 2 
H60 H 0.0926 0.6034 0.5584 0.100 Uiso 0.338(8) 1 calc PR A 2 
H60A H 0.1391 0.6416 0.6193 0.100 Uiso 0.338(8) 1 calc PR A 2 
H60B H 0.0922 0.5378 0.6419 0.100 Uiso 0.338(8) 1 calc PR A 2 
C61 C 0.3791(16) 0.5659(8) 0.6476(6) 0.075(4) Uani 0.338(8) 1 d P A 2 
H61 H 0.3786 0.6262 0.6522 0.050 Uiso 0.338(8) 1 calc PR A 2 
H61A H 0.4780 0.5495 0.6347 0.050 Uiso 0.338(8) 1 calc PR A 2 
H61B H 0.3380 0.5219 0.6948 0.100 Uiso 0.338(8) 1 calc PR A 2 
 
loop_ 
 _atom_site_aniso_label 
 _atom_site_aniso_U_11 
 _atom_site_aniso_U_22 
 _atom_site_aniso_U_33 
 _atom_site_aniso_U_23 
 _atom_site_aniso_U_13 
 _atom_site_aniso_U_12 
C1 0.0296(13) 0.0319(12) 0.0286(12) -0.0161(10) 0.0015(10) -0.0046(10) 
C2 0.0272(13) 0.0329(12) 0.0279(12) -0.0154(10) 0.0016(10) -0.0031(10) 
C3 0.0302(13) 0.0307(12) 0.0233(11) -0.0119(10) -0.0026(10) -0.0026(10) 
C4 0.0273(13) 0.0348(13) 0.0272(12) -0.0132(10) -0.0032(10) 0.0017(10) 
C5 0.0289(13) 0.0323(12) 0.0257(12) -0.0152(10) 0.0008(10) 0.0004(10) 
C6 0.0317(14) 0.0409(14) 0.0308(13) -0.0176(11) 0.0014(11) -0.0022(11) 
C7 0.0391(17) 0.0474(17) 0.0369(15) -0.0215(13) 0.0038(13) 0.0055(13) 
C8 0.0339(16) 0.062(2) 0.0511(18) -0.0329(17) 0.0083(14) -0.0113(14) 
C9 0.0443(18) 0.0544(19) 0.0287(13) -0.0199(13) 0.0065(13) 0.0007(14) 
P1 0.0275(4) 0.0327(3) 0.0267(3) -0.0153(3) 0.0010(3) -0.0014(3) 
P2 0.0276(3) 0.0327(3) 0.0264(3) -0.0156(3) 0.0019(3) -0.0032(3) 
N1 0.0297(11) 0.0327(11) 0.0277(10) -0.0130(9) 0.0017(9) 0.0005(9) 
N2 0.0311(11) 0.0321(11) 0.0284(10) -0.0132(9) 0.0008(9) 0.0009(9) 
N3 0.0314(11) 0.0343(11) 0.0273(10) -0.0129(9) -0.0001(9) 0.0012(9) 
N4 0.0368(13) 0.0356(12) 0.0380(12) -0.0128(10) 0.0043(11) 0.0050(10) 
N5 0.0314(12) 0.0285(10) 0.0300(10) -0.0091(9) 0.0025(9) -0.0002(9) 
C10 0.0266(12) 0.0308(12) 0.0293(12) -0.0156(10) 0.0033(10) -0.0021(10) 
C11 0.0280(13) 0.0314(12) 0.0375(13) -0.0180(11) -0.0019(11) -0.0024(10) 
C12 0.0320(14) 0.0342(13) 0.0415(15) -0.0178(12) 0.0034(12) -0.0113(11) 
C13 0.0398(15) 0.0292(12) 0.0371(14) -0.0140(11) 0.0042(12) -0.0034(11) 
C14 0.0392(15) 0.0365(14) 0.0321(13) -0.0143(11) -0.0010(12) -0.0026(11) 
C15 0.0277(13) 0.0287(12) 0.0351(13) -0.0152(11) -0.0019(11) -0.0056(10) 
C16 0.0350(14) 0.0345(13) 0.0387(14) -0.0191(11) -0.0009(12) -0.0044(11) 
C17 0.0507(19) 0.0412(16) 0.0525(18) -0.0235(15) -0.0091(17) -0.0115(14) 
C18 0.0406(16) 0.0469(16) 0.0404(15) -0.0258(13) -0.0047(13) -0.0036(13) 
C19 0.0363(16) 0.0417(16) 0.0464(16) -0.0206(13) -0.0104(14) -0.0007(12) 
C20 0.0288(13) 0.0382(14) 0.0334(13) -0.0126(11) -0.0069(11) -0.0049(10) 
C21 0.043(2) 0.062(2) 0.081(3) -0.004(2) -0.031(2) -0.0062(17) 
C22 0.0242(14) 0.068(2) 0.0462(16) -0.0309(16) -0.0003(13) -0.0068(14) 
C23 0.0340(16) 0.0590(19) 0.0474(17) -0.0316(15) 0.0019(14) -0.0136(14) 
C24 0.0271(13) 0.0322(12) 0.0261(11) -0.0136(10) 0.0006(10) 0.0008(10) 
C25 0.0324(14) 0.0376(14) 0.0335(13) -0.0164(11) -0.0036(11) 0.0031(11) 
C26 0.0385(16) 0.0352(14) 0.0448(16) -0.0165(13) -0.0071(13) 0.0064(12) 
C27 0.0474(17) 0.0386(15) 0.0475(16) -0.0217(13) -0.0042(14) 0.0069(13) 
C28 0.0455(17) 0.0404(15) 0.0421(15) -0.0242(13) -0.0023(13) -0.0073(13) 
C29 0.0364(14) 0.0330(13) 0.0276(12) -0.0153(10) 0.0016(11) -0.0051(10) 
C30 0.0309(14) 0.0409(14) 0.0438(15) -0.0210(12) -0.0108(12) 0.0039(11) 
C31 0.0399(16) 0.0496(17) 0.0398(15) -0.0250(14) -0.0119(13) 0.0014(13) 
C32 0.0316(16) 0.0511(18) 0.0562(19) -0.0220(16) -0.0108(15) 0.0006(13) 
C33 0.0447(19) 0.065(2) 0.063(2) -0.0350(19) -0.0283(18) 0.0175(16) 
C34 0.0372(15) 0.0387(14) 0.0302(13) -0.0144(11) -0.0019(11) -0.0060(11) 
C35 0.0410(17) 0.0525(18) 0.0463(17) -0.0212(15) -0.0042(14) -0.0185(14) 
C36 0.0463(18) 0.0486(17) 0.0354(15) -0.0170(13) -0.0082(13) -0.0097(14) 
C37 0.0341(16) 0.0505(17) 0.0402(16) -0.0204(14) -0.0031(13) 0.0010(13) 
C38 0.0358(15) 0.0379(14) 0.0318(14) -0.0096(12) -0.0017(12) 0.0033(12) 
C39 0.0508(19) 0.0339(14) 0.0397(15) -0.0142(12) -0.0073(14) 0.0047(13) 
C40 0.061(2) 0.0421(17) 0.0515(19) -0.0164(15) -0.0082(17) 0.0122(16) 
C41 0.122(4) 0.052(2) 0.057(2) -0.019(2) -0.010(3) 0.037(3) 
C42 0.0508(19) 0.0334(14) 0.0434(16) -0.0078(13) -0.0012(15) 0.0052(13) 
C43 0.061(5) 0.037(3) 0.051(4) -0.013(3) 0.014(3) 0.001(3) 
C44 0.090(7) 0.079(5) 0.063(4) -0.031(4) -0.011(4) -0.018(4) 
C45 0.205(10) 0.131(6) 0.131(6) -0.076(6) -0.043(8) -0.040(7) 
C46 0.050(7) 0.042(5) 0.063(7) -0.016(5) -0.010(5) -0.003(5) 
C47 0.089(10) 0.052(6) 0.055(6) -0.027(5) -0.011(6) 0.013(5) 
C48 0.073(3) 0.0435(18) 0.089(3) -0.0389(19) -0.016(2) 0.0152(17) 
C49 0.128(9) 0.036(4) 0.078(5) -0.015(4) 0.011(6) 0.006(4) 
C50 0.167(14) 0.102(10) 0.30(3) -0.146(15) -0.154(16) 0.104(10) 
C51 0.118(9) 0.052(4) 0.125(9) -0.052(5) 0.043(6) -0.004(5) 
C52 0.046(8) 0.060(12) 0.27(4) -0.111(18) -0.041(14) 0.014(7) 
C53 0.139(17) 0.044(6) 0.080(9) -0.016(6) 0.011(10) 0.021(9) 
C54 0.090(12) 0.053(6) 0.079(11) -0.026(7) 0.032(8) 0.027(7) 
C55 0.0528(19) 0.0413(15) 0.0360(15) -0.0130(13) 0.0077(14) -0.0086(13) 
C56 0.070(4) 0.041(3) 0.052(3) 0.002(3) 0.000(3) 0.002(3) 
C57 0.054(3) 0.053(3) 0.054(3) -0.012(3) 0.009(3) -0.026(3) 
C58 0.084(5) 0.056(3) 0.038(3) -0.025(2) 0.022(3) -0.026(3) 
C59 0.113(13) 0.039(6) 0.049(6) -0.001(5) 0.005(7) -0.015(6) 
C60 0.099(12) 0.067(9) 0.064(8) 0.031(8) 0.041(8) 0.006(8) 
C61 0.108(11) 0.052(7) 0.040(5) 0.005(5) 0.022(6) -0.006(7) 
 
_geom_special_details 
; 
 All esds (except the esd in the dihedral angle between two l.s. planes) 
 are estimated using the full covariance matrix.  The cell esds are taken 
 into account individually in the estimation of esds in distances, angles 
 and torsion angles; correlations between esds in cell parameters are only 
 used when they are defined by crystal symmetry.  An approximate (isotropic) 
 treatment of cell esds is used for estimating esds involving l.s. planes. 
; 
 
loop_ 
 _geom_bond_atom_site_label_1 
 _geom_bond_atom_site_label_2 
 _geom_bond_distance 
 _geom_bond_site_symmetry_2 
 _geom_bond_publ_flag 
C1 C24 1.475(3) . ? 
C1 P2 1.723(2) . ? 
C1 P1 1.775(3) . ? 
C2 C10 1.489(3) . ? 
C2 P2 1.734(3) . ? 
C2 P1 1.780(2) . ? 
C3 N3 1.326(3) . ? 
C3 N1 1.337(3) . ? 
C3 P1 1.833(3) . ? 
C4 N2 1.340(3) . ? 
C4 N1 1.341(3) . ? 
C4 N4 1.354(3) . ? 
C5 N5 1.338(3) . ? 
C5 N3 1.347(3) . ? 
C5 N2 1.352(3) . ? 
C6 C8 1.523(4) . ? 
C6 C7 1.532(4) . ? 
C6 C9 1.534(4) . ? 
C6 P2 1.870(3) . ? 
P1 P2 2.4283(9) . ? 
N4 C42 1.459(4) . ? 
N5 C38 1.474(3) . ? 
C10 C15 1.422(3) . ? 
C10 C11 1.427(3) . ? 
C11 C12 1.402(4) . ? 
C11 C16 1.547(4) . ? 
C12 C13 1.384(4) . ? 
C13 C14 1.384(4) . ? 
C13 C55 1.528(4) . ? 
C14 C15 1.399(3) . ? 
C15 C20 1.565(3) . ? 
C16 C19 1.538(4) . ? 
C16 C18 1.540(4) . ? 
C16 C17 1.542(4) . ? 
C20 C22 1.525(4) . ? 
C20 C23 1.528(4) . ? 
C20 C21 1.547(4) . ? 
C24 C29 1.422(4) . ? 
C24 C25 1.434(3) . ? 
C25 C26 1.396(4) . ? 
C25 C30 1.544(4) . ? 
C26 C27 1.378(4) . ? 
C27 C28 1.383(4) . ? 
C27 C48 1.536(4) . ? 
C28 C29 1.402(4) . ? 
C29 C34 1.560(4) . ? 
C30 C32 1.523(4) . ? 
C30 C31 1.539(4) . ? 
C30 C33 1.555(4) . ? 
C34 C37 1.534(4) . ? 
C34 C36 1.540(4) . ? 
C34 C35 1.543(4) . ? 
C38 C39 1.510(4) . ? 
C39 C40 1.521(4) . ? 
C40 C41 1.517(5) . ? 
C42 C43 1.466(7) . ? 
C42 C46 1.604(13) . ? 
C43 C44 1.546(13) . ? 
C44 C45 1.596(12) . ? 
C45 C47 1.564(14) . ? 
C46 C47 1.523(18) . ? 
C48 C54 1.419(14) . ? 
C48 C52 1.451(17) . ? 
C48 C50 1.487(10) . ? 
C48 C49 1.501(14) . ? 
C48 C53 1.587(17) . ? 
C48 C51 1.606(12) . ? 
C55 C60 1.431(14) . ? 
C55 C56 1.514(7) . ? 
C55 C59 1.540(12) . ? 
C55 C57 1.542(6) . ? 
C55 C58 1.547(6) . ? 
C55 C61 1.573(14) . ? 
 
loop_ 
 _geom_angle_atom_site_label_1 
 _geom_angle_atom_site_label_2 
 _geom_angle_atom_site_label_3 
 _geom_angle 
 _geom_angle_site_symmetry_1 
 _geom_angle_site_symmetry_3 
 _geom_angle_publ_flag 
C24 C1 P2 127.13(19) . . ? 
C24 C1 P1 144.96(19) . . ? 
P2 C1 P1 87.90(11) . . ? 
C10 C2 P2 125.62(18) . . ? 
C10 C2 P1 144.68(19) . . ? 
P2 C2 P1 87.42(11) . . ? 
N3 C3 N1 127.5(2) . . ? 
N3 C3 P1 115.59(18) . . ? 
N1 C3 P1 116.49(17) . . ? 
N2 C4 N1 125.9(2) . . ? 
N2 C4 N4 116.7(2) . . ? 
N1 C4 N4 117.4(2) . . ? 
N5 C5 N3 118.2(2) . . ? 
N5 C5 N2 116.7(2) . . ? 
N3 C5 N2 125.1(2) . . ? 
C8 C6 C7 110.7(3) . . ? 
C8 C6 C9 109.7(3) . . ? 
C7 C6 C9 110.2(2) . . ? 
C8 C6 P2 110.8(2) . . ? 
C7 C6 P2 107.44(19) . . ? 
C9 C6 P2 107.85(19) . . ? 
C1 P1 C2 90.53(12) . . ? 
C1 P1 C3 114.76(12) . . ? 
C2 P1 C3 116.57(11) . . ? 
C1 P1 P2 45.17(8) . . ? 
C2 P1 P2 45.50(8) . . ? 
C3 P1 P2 130.81(8) . . ? 
C1 P2 C2 93.86(12) . . ? 
C1 P2 C6 121.75(12) . . ? 
C2 P2 C6 123.33(12) . . ? 
C1 P2 P1 46.92(8) . . ? 
C2 P2 P1 47.08(8) . . ? 
C6 P2 P1 138.96(9) . . ? 
C3 N1 C4 113.2(2) . . ? 
C4 N2 C5 114.2(2) . . ? 
C3 N3 C5 113.6(2) . . ? 
C4 N4 C42 124.4(2) . . ? 
C5 N5 C38 122.7(2) . . ? 
C15 C10 C11 118.0(2) . . ? 
C15 C10 C2 118.2(2) . . ? 
C11 C10 C2 122.9(2) . . ? 
C12 C11 C10 117.6(2) . . ? 
C12 C11 C16 118.4(2) . . ? 
C10 C11 C16 123.9(2) . . ? 
C13 C12 C11 123.7(2) . . ? 
C14 C13 C12 116.1(2) . . ? 
C14 C13 C55 121.0(3) . . ? 
C12 C13 C55 122.8(3) . . ? 
C13 C14 C15 123.3(3) . . ? 
C14 C15 C10 118.2(2) . . ? 
C14 C15 C20 116.1(2) . . ? 
C10 C15 C20 125.6(2) . . ? 
C19 C16 C18 112.0(2) . . ? 
C19 C16 C17 106.7(2) . . ? 
C18 C16 C17 105.5(2) . . ? 
C19 C16 C11 112.1(2) . . ? 
C18 C16 C11 108.5(2) . . ? 
C17 C16 C11 111.8(2) . . ? 
C22 C20 C23 110.0(2) . . ? 
C22 C20 C21 105.6(3) . . ? 
C23 C20 C21 107.0(3) . . ? 
C22 C20 C15 112.0(2) . . ? 
C23 C20 C15 112.4(2) . . ? 
C21 C20 C15 109.5(2) . . ? 
C29 C24 C25 118.0(2) . . ? 
C29 C24 C1 118.4(2) . . ? 
C25 C24 C1 122.3(2) . . ? 
C26 C25 C24 118.3(2) . . ? 
C26 C25 C30 118.6(2) . . ? 
C24 C25 C30 123.1(2) . . ? 
C27 C26 C25 123.7(3) . . ? 
C26 C27 C28 116.4(3) . . ? 
C26 C27 C48 122.7(3) . . ? 
C28 C27 C48 120.9(3) . . ? 
C27 C28 C29 123.5(3) . . ? 
C28 C29 C24 118.2(2) . . ? 
C28 C29 C34 114.4(2) . . ? 
C24 C29 C34 127.4(2) . . ? 
C32 C30 C31 111.5(3) . . ? 
C32 C30 C25 112.5(2) . . ? 
C31 C30 C25 108.8(2) . . ? 
C32 C30 C33 106.8(3) . . ? 
C31 C30 C33 105.1(3) . . ? 
C25 C30 C33 111.9(2) . . ? 
C37 C34 C36 108.8(2) . . ? 
C37 C34 C35 105.2(2) . . ? 
C36 C34 C35 108.2(2) . . ? 
C37 C34 C29 115.8(2) . . ? 
C36 C34 C29 109.9(2) . . ? 
C35 C34 C29 108.6(2) . . ? 
N5 C38 C39 114.7(2) . . ? 
C38 C39 C40 112.6(3) . . ? 
C41 C40 C39 112.2(3) . . ? 
N4 C42 C43 113.1(3) . . ? 
N4 C42 C46 108.8(4) . . ? 
C43 C42 C46 34.4(4) . . ? 
C42 C43 C44 111.4(7) . . ? 
C43 C44 C45 108.6(8) . . ? 
C47 C45 C44 48.2(5) . . ? 
C47 C46 C42 111.5(9) . . ? 
C46 C47 C45 100.8(10) . . ? 
C54 C48 C52 114.4(13) . . ? 
C54 C48 C50 69.9(9) . . ? 
C52 C48 C50 125.4(11) . . ? 
C54 C48 C49 130.5(10) . . ? 
C52 C48 C49 22.0(18) . . ? 
C50 C48 C49 112.4(10) . . ? 
C54 C48 C27 111.2(6) . . ? 
C52 C48 C27 114.4(8) . . ? 
C50 C48 C27 113.0(4) . . ? 
C49 C48 C27 112.1(6) . . ? 
C54 C48 C53 109.8(9) . . ? 
C52 C48 C53 99.5(15) . . ? 
C50 C48 C53 41.0(8) . . ? 
C49 C48 C53 79.4(11) . . ? 
C27 C48 C53 106.6(6) . . ? 
C54 C48 C51 40.3(7) . . ? 
C52 C48 C51 83.6(15) . . ? 
C50 C48 C51 108.9(8) . . ? 
C49 C48 C51 105.1(7) . . ? 
C27 C48 C51 104.6(4) . . ? 
C53 C48 C51 143.9(7) . . ? 
C60 C55 C56 141.2(5) . . ? 
C60 C55 C13 108.5(5) . . ? 
C56 C55 C13 109.3(3) . . ? 
C60 C55 C59 110.1(10) . . ? 
C56 C55 C59 47.7(7) . . ? 
C13 C55 C59 109.8(5) . . ? 
C60 C55 C57 45.7(9) . . ? 
C56 C55 C57 109.7(4) . . ? 
C13 C55 C57 112.9(3) . . ? 
C59 C55 C57 66.0(7) . . ? 
C60 C55 C58 65.6(10) . . ? 
C56 C55 C58 108.8(5) . . ? 
C13 C55 C58 109.2(3) . . ? 
C59 C55 C58 139.7(5) . . ? 
C57 C55 C58 106.8(4) . . ? 
C60 C55 C61 111.2(10) . . ? 
C56 C55 C61 60.7(6) . . ? 
C13 C55 C61 112.3(5) . . ? 
C59 C55 C61 104.8(8) . . ? 
C57 C55 C61 134.1(5) . . ? 
C58 C55 C61 49.9(6) . . ? 
 
loop_ 
 _geom_torsion_atom_site_label_1 
 _geom_torsion_atom_site_label_2 
 _geom_torsion_atom_site_label_3 
 _geom_torsion_atom_site_label_4 
 _geom_torsion 
 _geom_torsion_site_symmetry_1 
 _geom_torsion_site_symmetry_2 
 _geom_torsion_site_symmetry_3 
 _geom_torsion_site_symmetry_4 
 _geom_torsion_publ_flag 
C24 C1 P1 C2 175.0(3) . . . . ? 
P2 C1 P1 C2 -4.00(12) . . . . ? 
C24 C1 P1 C3 55.2(4) . . . . ? 
P2 C1 P1 C3 -123.80(11) . . . . ? 
C24 C1 P1 P2 179.0(4) . . . . ? 
C10 C2 P1 C1 164.8(3) . . . . ? 
P2 C2 P1 C1 3.98(12) . . . . ? 
C10 C2 P1 C3 -77.0(3) . . . . ? 
P2 C2 P1 C3 122.21(11) . . . . ? 
C10 C2 P1 P2 160.8(4) . . . . ? 
N3 C3 P1 C1 -43.8(2) . . . . ? 
N1 C3 P1 C1 142.69(19) . . . . ? 
N3 C3 P1 C2 -147.81(18) . . . . ? 
N1 C3 P1 C2 38.7(2) . . . . ? 
N3 C3 P1 P2 -94.93(19) . . . . ? 
N1 C3 P1 P2 91.6(2) . . . . ? 
C24 C1 P2 C2 -175.2(2) . . . . ? 
P1 C1 P2 C2 4.12(12) . . . . ? 
C24 C1 P2 C6 51.3(3) . . . . ? 
P1 C1 P2 C6 -129.47(12) . . . . ? 
C24 C1 P2 P1 -179.3(3) . . . . ? 
C10 C2 P2 C1 -170.6(2) . . . . ? 
P1 C2 P2 C1 -4.11(12) . . . . ? 
C10 C2 P2 C6 -38.1(3) . . . . ? 
P1 C2 P2 C6 128.40(12) . . . . ? 
C10 C2 P2 P1 -166.5(3) . . . . ? 
C8 C6 P2 C1 80.8(2) . . . . ? 
C7 C6 P2 C1 -40.3(2) . . . . ? 
C9 C6 P2 C1 -159.11(19) . . . . ? 
C8 C6 P2 C2 -39.3(3) . . . . ? 
C7 C6 P2 C2 -160.41(19) . . . . ? 
C9 C6 P2 C2 80.8(2) . . . . ? 
C8 C6 P2 P1 21.6(3) . . . . ? 
C7 C6 P2 P1 -99.5(2) . . . . ? 
C9 C6 P2 P1 141.71(17) . . . . ? 
C2 P1 P2 C1 174.39(16) . . . . ? 
C3 P1 P2 C1 85.53(16) . . . . ? 
C1 P1 P2 C2 -174.39(16) . . . . ? 
C3 P1 P2 C2 -88.86(15) . . . . ? 
C1 P1 P2 C6 91.33(18) . . . . ? 
C2 P1 P2 C6 -94.28(17) . . . . ? 
C3 P1 P2 C6 176.86(15) . . . . ? 
N3 C3 N1 C4 5.6(4) . . . . ? 
P1 C3 N1 C4 178.19(17) . . . . ? 
N2 C4 N1 C3 0.4(4) . . . . ? 
N4 C4 N1 C3 -178.6(2) . . . . ? 
N1 C4 N2 C5 -5.3(4) . . . . ? 
N4 C4 N2 C5 173.7(2) . . . . ? 
N5 C5 N2 C4 -174.1(2) . . . . ? 
N3 C5 N2 C4 5.3(4) . . . . ? 
N1 C3 N3 C5 -5.5(4) . . . . ? 
P1 C3 N3 C5 -178.23(17) . . . . ? 
N5 C5 N3 C3 178.9(2) . . . . ? 
N2 C5 N3 C3 -0.4(4) . . . . ? 
N2 C4 N4 C42 -173.4(3) . . . . ? 
N1 C4 N4 C42 5.6(4) . . . . ? 
N3 C5 N5 C38 -11.0(4) . . . . ? 
N2 C5 N5 C38 168.4(2) . . . . ? 
P2 C2 C10 C15 -61.8(3) . . . . ? 
P1 C2 C10 C15 142.0(3) . . . . ? 
P2 C2 C10 C11 107.1(3) . . . . ? 
P1 C2 C10 C11 -49.2(4) . . . . ? 
C15 C10 C11 C12 16.4(4) . . . . ? 
C2 C10 C11 C12 -152.5(2) . . . . ? 
C15 C10 C11 C16 -160.8(2) . . . . ? 
C2 C10 C11 C16 30.3(4) . . . . ? 
C10 C11 C12 C13 -2.4(4) . . . . ? 
C16 C11 C12 C13 174.9(3) . . . . ? 
C11 C12 C13 C14 -9.6(4) . . . . ? 
C11 C12 C13 C55 174.0(3) . . . . ? 
C12 C13 C14 C15 7.7(4) . . . . ? 
C55 C13 C14 C15 -175.8(2) . . . . ? 
C13 C14 C15 C10 6.2(4) . . . . ? 
C13 C14 C15 C20 -169.7(3) . . . . ? 
C11 C10 C15 C14 -18.2(4) . . . . ? 
C2 C10 C15 C14 151.2(2) . . . . ? 
C11 C10 C15 C20 157.2(2) . . . . ? 
C2 C10 C15 C20 -33.3(4) . . . . ? 
C12 C11 C16 C19 108.2(3) . . . . ? 
C10 C11 C16 C19 -74.6(3) . . . . ? 
C12 C11 C16 C18 -127.5(3) . . . . ? 
C10 C11 C16 C18 49.7(3) . . . . ? 
C12 C11 C16 C17 -11.5(3) . . . . ? 
C10 C11 C16 C17 165.7(3) . . . . ? 
C14 C15 C20 C22 147.2(3) . . . . ? 
C10 C15 C20 C22 -28.4(4) . . . . ? 
C14 C15 C20 C23 -88.4(3) . . . . ? 
C10 C15 C20 C23 96.0(3) . . . . ? 
C14 C15 C20 C21 30.3(4) . . . . ? 
C10 C15 C20 C21 -145.2(3) . . . . ? 
P2 C1 C24 C29 54.3(3) . . . . ? 
P1 C1 C24 C29 -124.4(3) . . . . ? 
P2 C1 C24 C25 -112.4(3) . . . . ? 
P1 C1 C24 C25 68.8(4) . . . . ? 
C29 C24 C25 C26 -11.9(4) . . . . ? 
C1 C24 C25 C26 154.8(3) . . . . ? 
C29 C24 C25 C30 167.5(2) . . . . ? 
C1 C24 C25 C30 -25.7(4) . . . . ? 
C24 C25 C26 C27 0.0(4) . . . . ? 
C30 C25 C26 C27 -179.5(3) . . . . ? 
C25 C26 C27 C28 8.7(4) . . . . ? 
C25 C26 C27 C48 -172.2(3) . . . . ? 
C26 C27 C28 C29 -5.6(4) . . . . ? 
C48 C27 C28 C29 175.3(3) . . . . ? 
C27 C28 C29 C24 -6.1(4) . . . . ? 
C27 C28 C29 C34 173.1(3) . . . . ? 
C25 C24 C29 C28 14.7(3) . . . . ? 
C1 C24 C29 C28 -152.6(2) . . . . ? 
C25 C24 C29 C34 -164.3(2) . . . . ? 
C1 C24 C29 C34 28.4(4) . . . . ? 
C26 C25 C30 C32 -112.4(3) . . . . ? 
C24 C25 C30 C32 68.1(3) . . . . ? 
C26 C25 C30 C31 123.5(3) . . . . ? 
C24 C25 C30 C31 -55.9(3) . . . . ? 
C26 C25 C30 C33 7.8(4) . . . . ? 
C24 C25 C30 C33 -171.6(3) . . . . ? 
C28 C29 C34 C37 -165.1(2) . . . . ? 
C24 C29 C34 C37 14.0(4) . . . . ? 
C28 C29 C34 C36 71.1(3) . . . . ? 
C24 C29 C34 C36 -109.8(3) . . . . ? 
C28 C29 C34 C35 -47.1(3) . . . . ? 
C24 C29 C34 C35 132.0(3) . . . . ? 
C5 N5 C38 C39 83.2(3) . . . . ? 
N5 C38 C39 C40 174.4(3) . . . . ? 
C38 C39 C40 C41 173.9(4) . . . . ? 
C4 N4 C42 C43 127.5(5) . . . . ? 
C4 N4 C42 C46 90.9(6) . . . . ? 
N4 C42 C43 C44 -75.2(6) . . . . ? 
C46 C42 C43 C44 14.5(8) . . . . ? 
C42 C43 C44 C45 171.7(6) . . . . ? 
C43 C44 C45 C47 -30.4(7) . . . . ? 
N4 C42 C46 C47 69.7(8) . . . . ? 
C43 C42 C46 C47 -34.1(7) . . . . ? 
C42 C46 C47 C45 176.4(7) . . . . ? 
C44 C45 C47 C46 16.9(6) . . . . ? 
C26 C27 C48 C54 70.2(11) . . . . ? 
C28 C27 C48 C54 -110.8(11) . . . . ? 
C26 C27 C48 C52 -158.4(18) . . . . ? 
C28 C27 C48 C52 20.7(19) . . . . ? 
C26 C27 C48 C50 -6.2(11) . . . . ? 
C28 C27 C48 C50 172.8(11) . . . . ? 
C26 C27 C48 C49 -134.5(6) . . . . ? 
C28 C27 C48 C49 44.5(7) . . . . ? 
C26 C27 C48 C53 -49.4(11) . . . . ? 
C28 C27 C48 C53 129.6(11) . . . . ? 
C26 C27 C48 C51 112.1(7) . . . . ? 
C28 C27 C48 C51 -68.9(7) . . . . ? 
C14 C13 C55 C60 121.5(10) . . . . ? 
C12 C13 C55 C60 -62.2(11) . . . . ? 
C14 C13 C55 C56 -67.2(5) . . . . ? 
C12 C13 C55 C56 109.1(4) . . . . ? 
C14 C13 C55 C59 -118.1(8) . . . . ? 
C12 C13 C55 C59 58.2(8) . . . . ? 
C14 C13 C55 C57 170.4(4) . . . . ? 
C12 C13 C55 C57 -13.3(5) . . . . ? 
C14 C13 C55 C58 51.7(5) . . . . ? 
C12 C13 C55 C58 -132.0(4) . . . . ? 
C14 C13 C55 C61 -1.8(7) . . . . ? 
C12 C13 C55 C61 174.4(6) . . . . ? 
 
_diffrn_measured_fraction_theta_max    0.993 
_diffrn_reflns_theta_full              27.49 
_diffrn_measured_fraction_theta_full   0.993 
_refine_diff_density_max    0.554 
_refine_diff_density_min   -0.796 
_refine_diff_density_rms    0.080 
